# Supplementary material
Source: Springer Nature journal article supplement (https://www.springermedizin.de/resource/supplementary/12883_2013_1166_MOESM7_ESM.pdf/9456236)

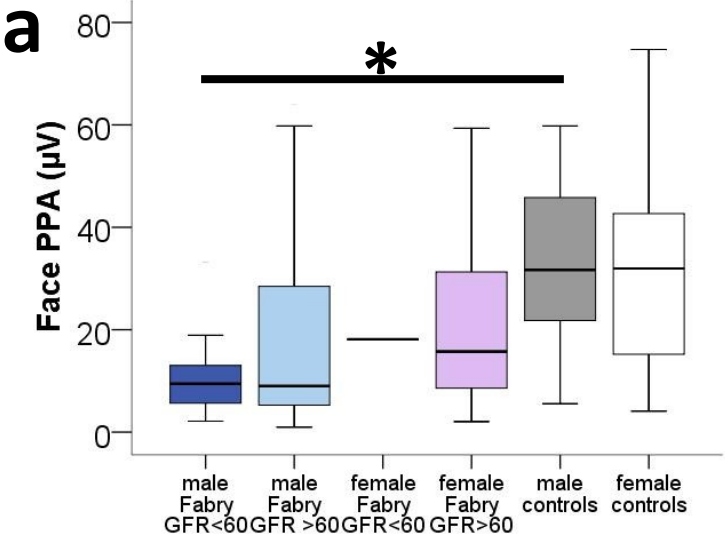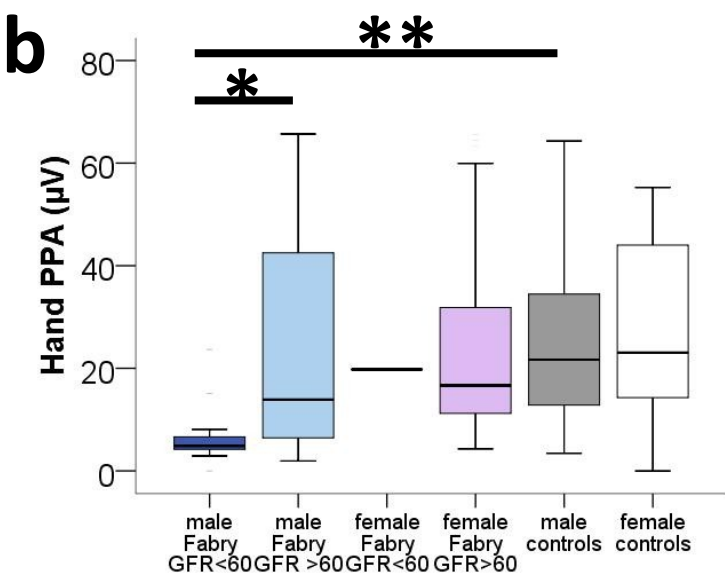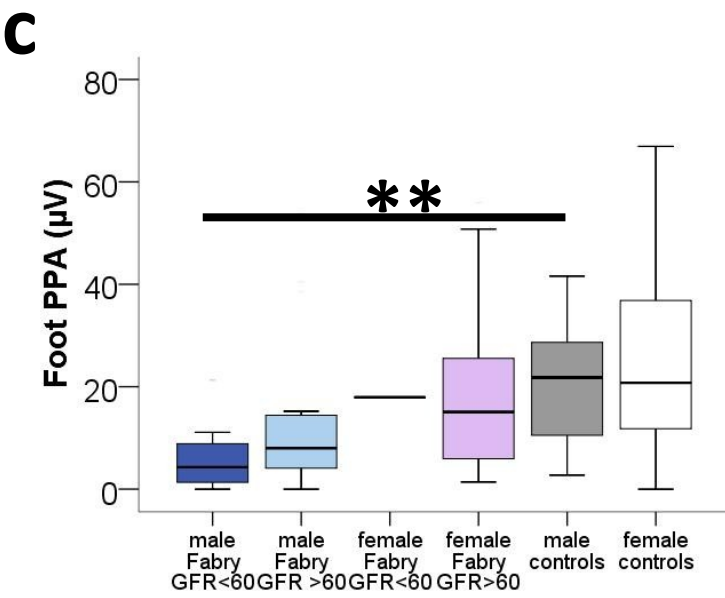

Supplement: MOESM7 [file 9456236]
